# Supplementary material
Source: publisher figshare collection journal article supplement (https://tandf.figshare.com/articles/dataset/_/19114823)

## Supplementary data

| Table 1A.<br>Proportion of cTx<br>and cNx registries<br>according to age<br>group and study<br>period. |     | Study period  |               |               |               | Difference oldest and<br>earliest period |
|--------------------------------------------------------------------------------------------------------|-----|---------------|---------------|---------------|---------------|------------------------------------------|
|                                                                                                        |     | 1989-<br>2003 | 2004-<br>2008 | 2009-<br>2013 | 2014-<br>2018 |                                          |
| Age: <50 years                                                                                         | cTx | 60,1%         | 39,3%         | 26,2%         | 17,6%         | -42,5%                                   |
|                                                                                                        | cNx | 32,1%         | 19,2%         | 8,1%          | 8,2%          | -23,9%                                   |
| Age: 50-74 years                                                                                       | cTx | 61,6%         | 40,0%         | 28,2%         | 16,0%         | -45,5%                                   |
|                                                                                                        | cNx | 34,8%         | 17,3%         | 9,9%          | 6,1%          | -28,7%                                   |
| Age: ≥75 years                                                                                         | cTx | 77,8%         | 60,7%         | 48,3%         | 29,1%         | -48,8%                                   |
|                                                                                                        | cNx | 59,3%         | 36,2%         | 22,6%         | 15,6%         | -43,7%                                   |

| Table 1B.<br>Proportion of cTx<br>and cNx registries<br>according to stage<br>and study period. |     | Study period  |               |               |               | Difference oldest and<br>earliest period |
|-------------------------------------------------------------------------------------------------|-----|---------------|---------------|---------------|---------------|------------------------------------------|
|                                                                                                 |     | 1989-<br>2003 | 2004-<br>2008 | 2009-<br>2013 | 2014-<br>2018 |                                          |
| Early-stage                                                                                     | cTx | 0%            | 0%            | 0%            | 0%            | 0%                                       |
|                                                                                                 | cNx | 0%            | 0%            | 0%            | 0%            | 0%                                       |
| Potentially curable                                                                             | cTx | 63,5%         | 16,1%         | 12,3%         | 8,1%          | -55,4%                                   |
|                                                                                                 | cNx | 63,2%         | 15,4%         | 11,9%         | 9,6%          | -53,6%                                   |
| Palliative                                                                                      | cTx | 44,2%         | 20,5%         | 21,1%         | 14,1%         | -30,1%                                   |
|                                                                                                 | cNx | 67,1%         | 16,7%         | 9,6%          | 6,6%          | -60,4%                                   |

| Supplementary Table 1. Baseline characteristics of study population according to diagnostic periods. |       |      |           |      |           |      |           |      |           |      |         |
|------------------------------------------------------------------------------------------------------|-------|------|-----------|------|-----------|------|-----------|------|-----------|------|---------|
| Baseline variable                                                                                    | Total |      | 1989-2003 |      | 2004-2008 |      | 2009-2013 |      | 2014-2018 |      |         |
| No. (% of total)                                                                                     |       |      |           |      |           |      |           |      |           |      |         |
|                                                                                                      | N     | %    | N         | %    | N         | %    | N         | %    | N         | %    | P-value |
| Age                                                                                                  |       |      |           |      |           |      |           |      |           |      | < 0.001 |
| 18-49 years                                                                                          | 3512  | 5.9  | 1819      | 7.9  | 590       | 5.6  | 581       | 4.7  | 522       | 3.8  |         |
| 50-74 years                                                                                          | 37469 | 63.2 | 14.236    | 61.5 | 6.560     | 62.8 | 7665      | 64.6 | 9008      | 66.0 |         |
| ≥75 years                                                                                            | 18303 | 30.9 | 7.095     | 30.6 | 3302      | 31.6 | 3779      | 30.7 | 4127      | 30.2 |         |
| Sex                                                                                                  |       |      |           |      |           |      |           |      |           |      | < 0.001 |
| Male                                                                                                 | 43625 | 73.2 | 16.574    | 71.6 | 7721      | 73.9 | 9194      | 74.6 | 10136     | 74.2 |         |
| Female                                                                                               | 15959 | 26.8 | 6.576     | 28.4 | 2731      | 26.1 | 3131      | 25.4 | 3521      | 25.8 |         |
| Histology                                                                                            |       |      |           |      |           |      |           |      |           |      | < 0.001 |
| Adenocarcinoma                                                                                       | 41898 | 70.3 | 15408     | 66.6 | 7480      | 71.6 | 8999      | 73.0 | 10011     | 73.3 |         |
| SCC                                                                                                  | 16185 | 27.2 | 7055      | 30.5 | 2690      | 25.7 | 3085      | 25.0 | 3355      | 24.6 |         |
| Carcinoma NOS                                                                                        | 1501  | 2.5  | 687       | 3.0  | 282       | 2.7  | 241       | 2.0  | 291       | 2.1  |         |
| Location of tumor                                                                                    |       |      |           |      |           |      |           |      |           |      | < 0.001 |
| Cervical esophagus                                                                                   | 685   | 1.1  | 388       | 1.7  | 116       | 1.1  | 100       | 0.8  | 81        | 0.6  |         |
| Upper third                                                                                          | 2527  | 4.2  | 947       | 4.1  | 429       | 4.1  | 524       | 4.3  | 627       | 4.6  |         |
| Middle third                                                                                         | 7744  | 13.0 | 3241      | 14.0 | 1270      | 12.2 | 1477      | 12.0 | 1756      | 12.9 |         |
| Lower third                                                                                          | 29970 | 50.3 | 9060      | 39.1 | 5569      | 53.3 | 7096      | 57.6 | 8245      | 60.4 |         |
| Cardia                                                                                               | 15483 | 26.0 | 8134      | 35.1 | 2585      | 24.7 | 2507      | 20.3 | 2257      | 16.5 |         |
| Esophagus NOS                                                                                        | 1203  | 2.0  | 404       | 1.7  | 168       | 1.6  | 221       | 1.8  | 410       | 3.0  |         |
| Overlapping                                                                                          | 1972  | 3.3  | 976       | 4.2  | 315       | 3.0  | 400       | 3.2  | 281       | 2.1  |         |
| Tumor differentiation                                                                                |       |      |           |      |           |      |           |      |           |      | < 0.001 |
| Well (G1)                                                                                            | 2233  | 3.7  | 924       | 4.0  | 306       | 2.9  | 356       | 2.9  | 647       | 4.7  |         |
| Moderate (G2)                                                                                        | 16339 | 27.4 | 7257      | 31.3 | 2444      | 23.4 | 2423      | 19.7 | 4215      | 30.9 |         |
| Poor (G3)                                                                                            | 20719 | 34.8 | 8857      | 38.3 | 3696      | 35.4 | 3803      | 30.9 | 4363      | 31.9 |         |
| Undiff. (G4)                                                                                         | 211   | 0.4  | 202       | 0.9  | 7         | 0.1  | 0         | 0.0  | 2         | 0.0  |         |
| Unknown (Gx)                                                                                         | 20082 | 33.7 | 5910      | 25.5 | 3999      | 38.3 | 5743      | 46.6 | 4430      | 32.4 |         |
| Clinical T-stage                                                                                     |       |      |           |      |           |      |           |      |           |      | < 0.001 |
| cT0                                                                                                  | 22    | 0.0  | 3         | 0.0  | 1         | 0.0  | 6         | 0.0  | 12        | 0.1  |         |
| cT1                                                                                                  | 2491  | 4.2  | 680       | 2.9  | 465       | 4.4  | 627       | 5.1  | 719       | 5.3  |         |
| cT2                                                                                                  | 9072  | 15.2 | 1536      | 6.6  | 1260      | 12.1 | 2270      | 18.4 | 4006      | 29.3 |         |
| cT3                                                                                                  | 15302 | 25.7 | 2811      | 12.1 | 2787      | 26.7 | 4306      | 34.9 | 5398      | 39.5 |         |
| cT4a                                                                                                 | 565   | 0.9  | 0         | 0.0  | 0         | 0.0  | 265       | 2.2  | 300       | 2.2  |         |
| cT4b                                                                                                 | 4931  | 8.3  | 2741      | 11.8 | 1080      | 10.3 | 625       | 5.1  | 485       | 3.6  |         |
| cTx                                                                                                  | 27201 | 45.7 | 15379     | 66.4 | 4859      | 46.5 | 4226      | 34.3 | 2737      | 20.0 |         |
| Clinical N-stage                                                                                     |       |      |           |      |           |      |           |      |           |      | < 0.001 |
| cN0                                                                                                  | 17655 | 29.6 | 5865      | 25.3 | 2751      | 26.3 | 4148      | 33.7 | 4891      | 35.8 |         |
| cN+                                                                                                  | 29031 | 48.7 | 9248      | 39.9 | 5575      | 53.3 | 6622      | 53.7 | 7586      | 55.5 |         |
| cNx                                                                                                  | 12898 | 21.6 | 8037      | 34.7 | 2126      | 20.3 | 1555      | 12.6 | 1180      | 8.6  |         |
| Treatment stage                                                                                      |       |      |           |      |           |      |           |      |           |      | < 0.001 |
| Early stage                                                                                          | 1417  | 2.4  | 312       | 1.3  | 251       | 2.4  | 387       | 3.1  | 467       | 3.4  |         |

|                            |       |      |       |      |      |      |      |      |      |      |  |
|----------------------------|-------|------|-------|------|------|------|------|------|------|------|--|
| <b>Potentially curable</b> | 35609 | 59.8 | 14228 | 61.5 | 5989 | 57.3 | 7279 | 59.1 | 8113 | 59.4 |  |
| <b>Palliative</b>          | 21896 | 36.7 | 8.206 | 35.4 | 4059 | 38.8 | 4567 | 37.1 | 5064 | 37.1 |  |
| <b>Unknown</b>             | 662   | 1.1  | 404   | 1.7  | 153  | 1.5  | 92   | 0.7  | 13   | 0.1  |  |

**Supplementary figure 1.** Estimated annual percent change (EAPC) in sex-specific esophageal cancer incidence rates in the Netherlands, period 1989-2018, according to smaller age groups and histology type: esophageal adenocarcinoma (2A and 2C) and squamous cell carcinoma (2B and D).

## A Incidence per age-groups (Male; EAC)

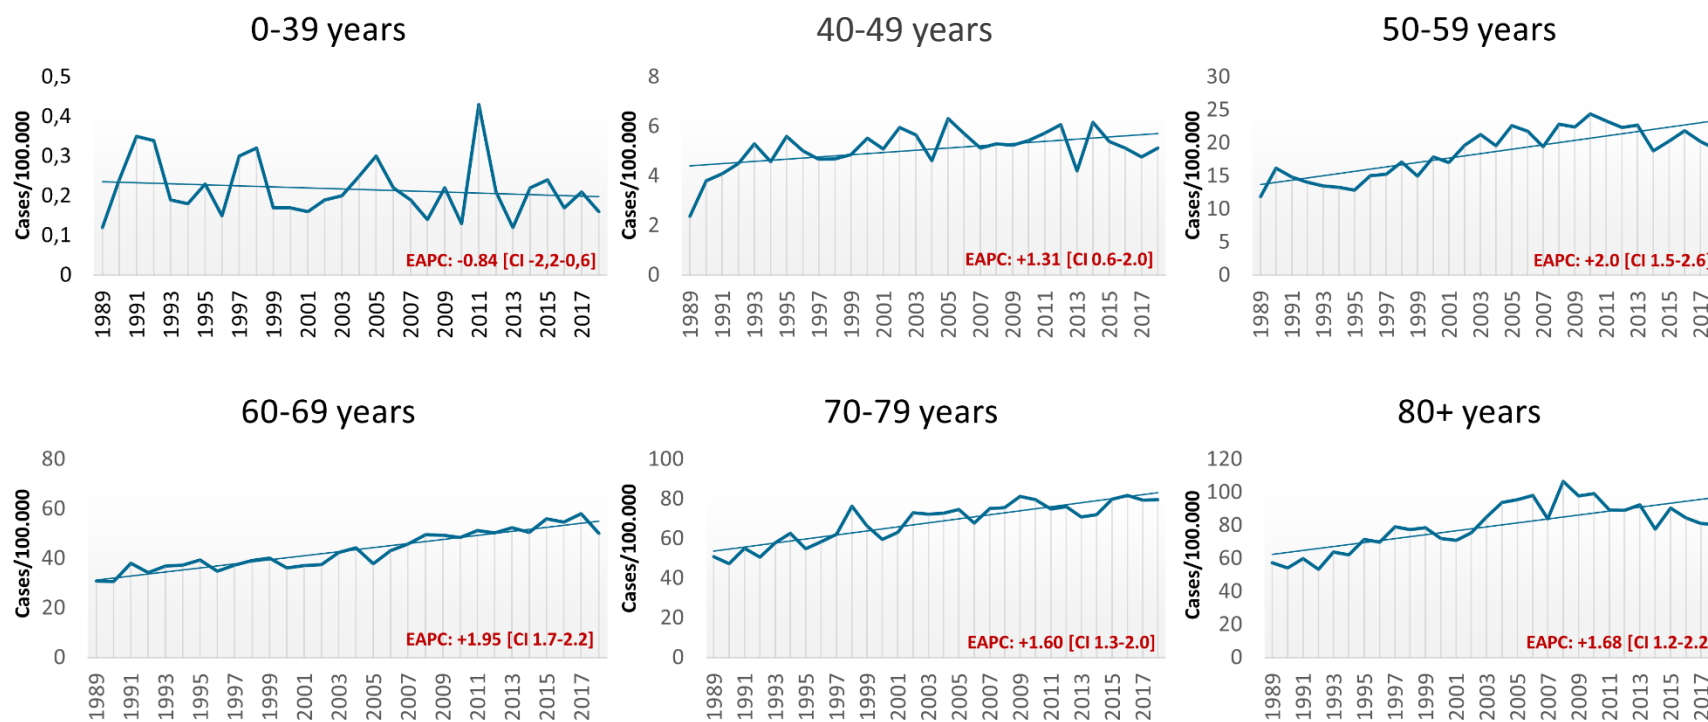

B

## Incidence per age-groups (Male; SCC)

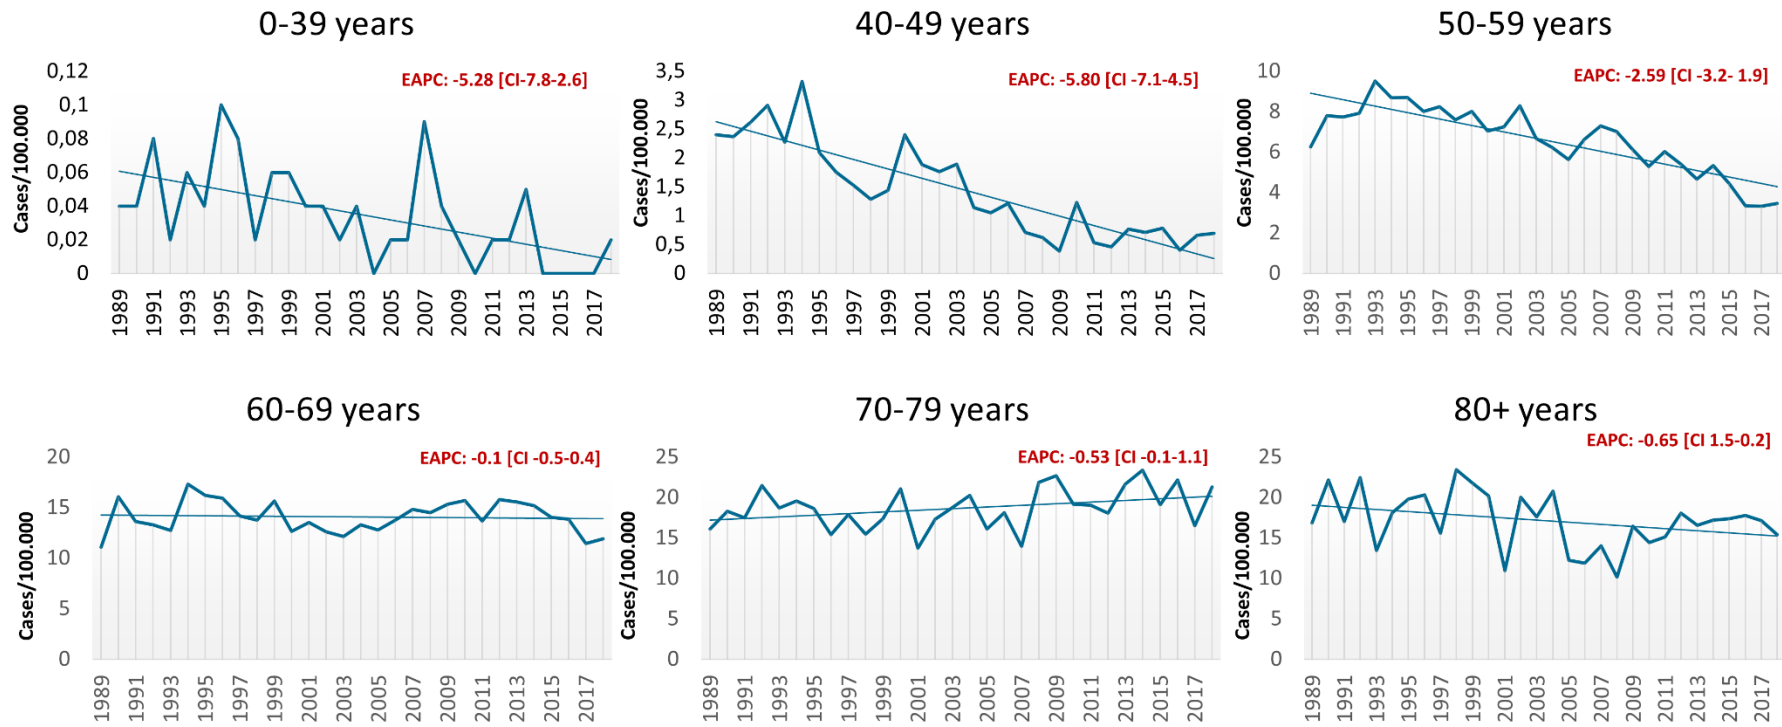

C

## Incidence per age-groups (Female; EAC)

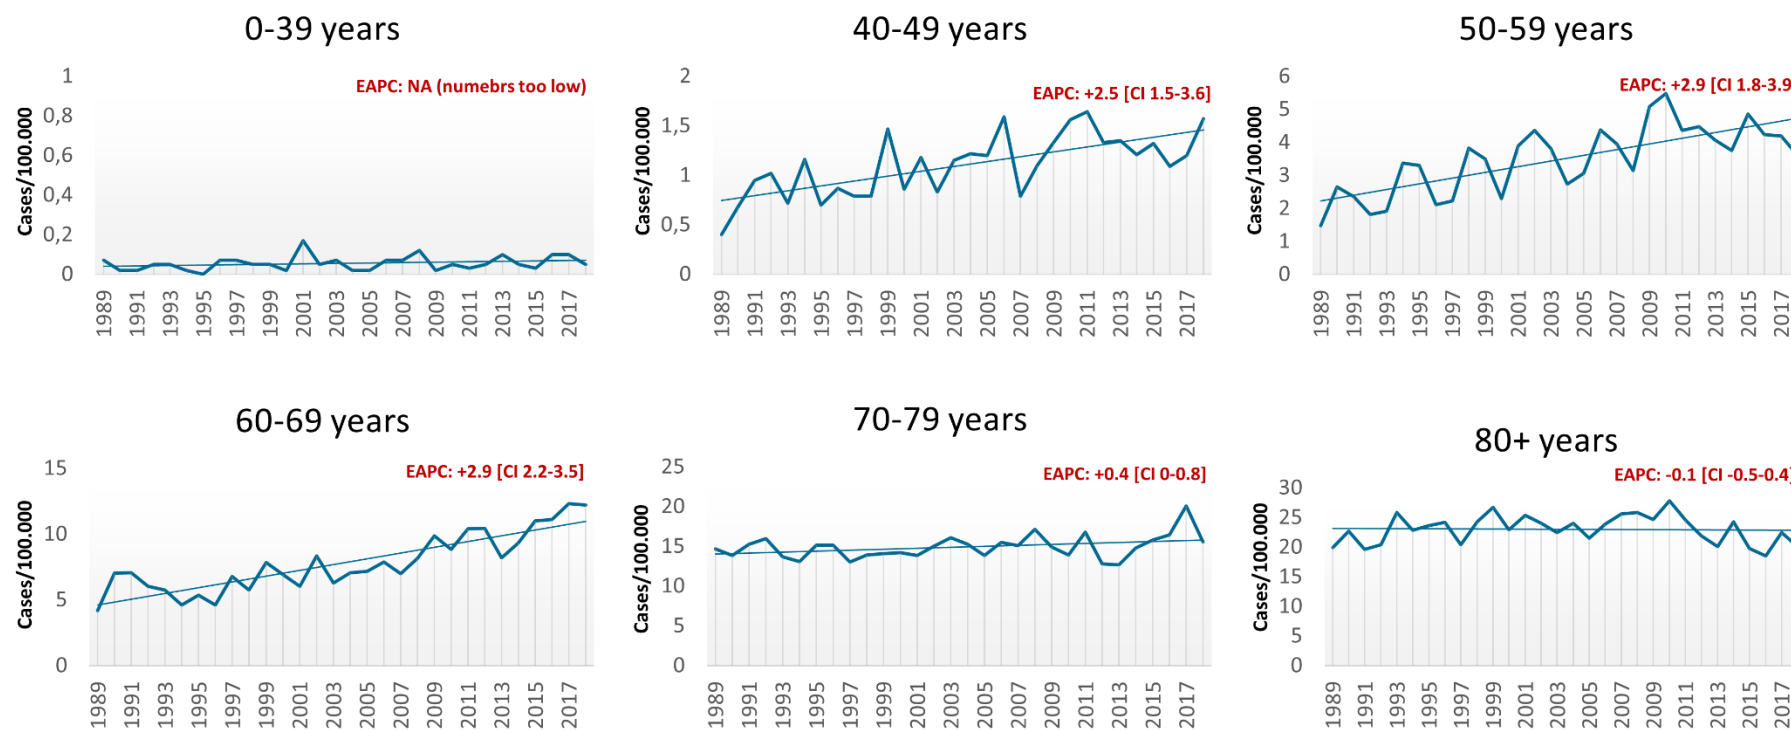

D

## Incidence per age-groups (Female; SCC)

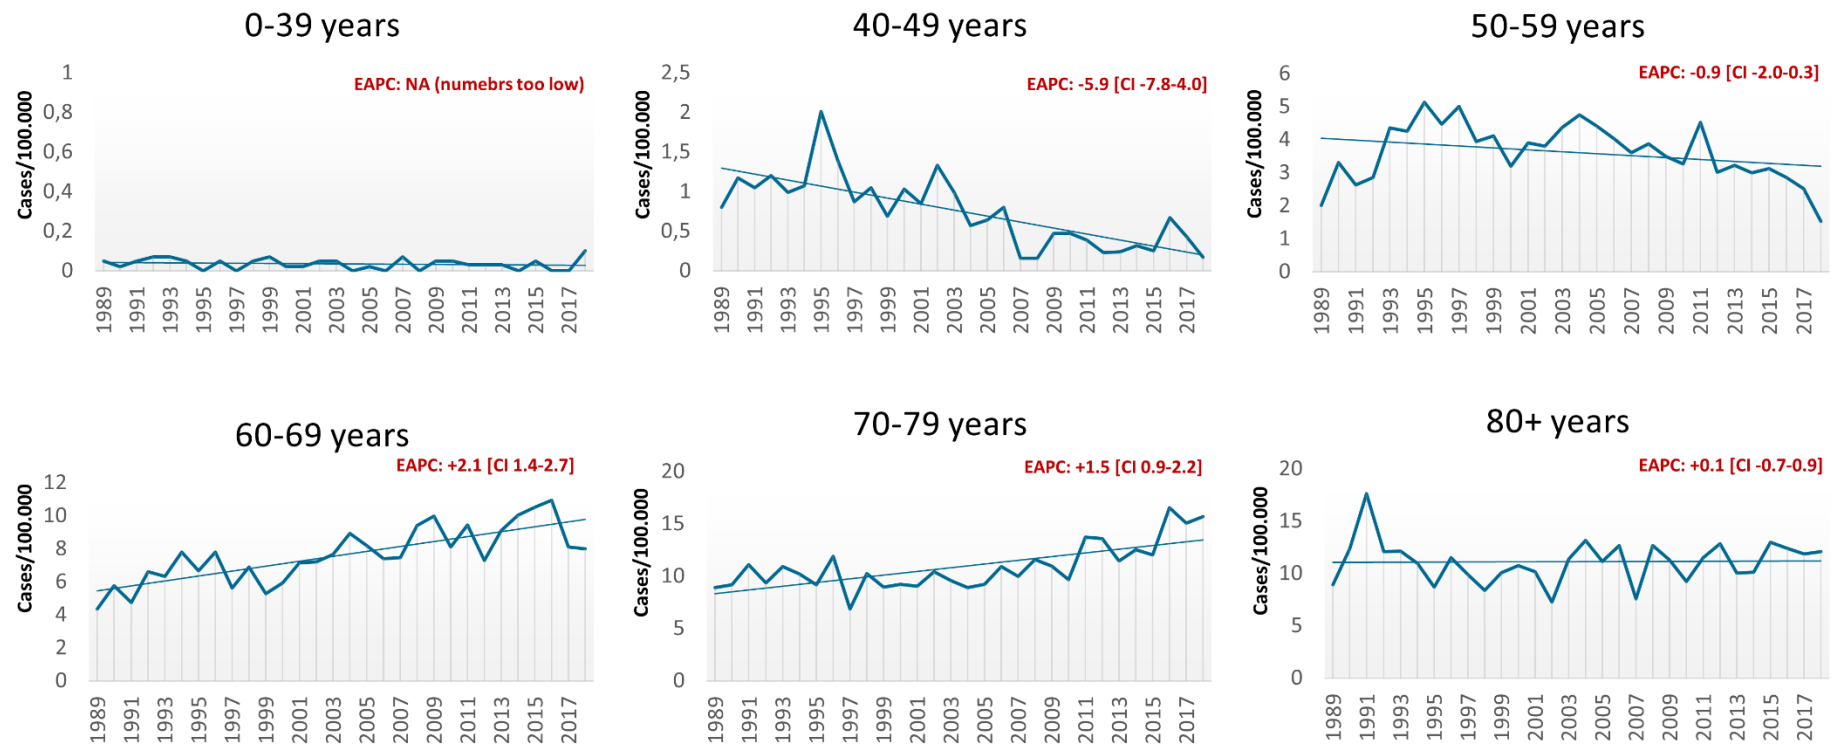

Supplement: Supplementary file 1 [file 1]
